# Supplementary material
Source: Research Square preprint supplement (doi:10.21203/rs.3.rs-9994279/v1)
Supplement: Supplementary file 1 [file 0b1e412f281638806e0d5b70.docx]

**SUPPLEMENTAL MATERIALS**

**Point‑of‑Care Ultrasound Accurately Detects COPD:**

**A Multicenter Prospective Diagnostic Accuracy Study**

Roy Rafael Dayan1,2, Itamar Ben Shitrit1,3, Ofri Karni1, Lev Freidkin4,5, Jonathan Taylor6, Omer Babayan1, Roni Jedwab1, Tomer Gat1, Roie Carmel1, Lior Fuchs1,7#, Michael Kassirer1,8#

1 Faculty of Health Sciences, Ben-Gurion University of the Negev, Israel

2 Department of Intensive Care Medicine, Tel-Aviv Medical Center, Israel

3 Clinical Research Center, Soroka University Medical Center, Israel

4 Gray School of Medicine, Faculty of Medical and Health Sciences, Tel Aviv University, Tel Aviv, Israel

5 Pulmonary division, Rabin Medical Center, Petah Tikva, Israel

6 Division of Respirology, University Health Network, Toronto, Ontario, Canada

7 Department of Intensive Care Medicine, Soroka University Medical Center, Israel

8 Pulmonary Institute, Soroka University Medical Center, Israel

Table of Contents

[Table S1 – Demographic, background medical history, mMRC Dyspnea Scale and POCUS examination stratified by recruiting center 3](#_Toc217769107)

[Table S2 . POCUS as a predictor of PFT metrics 6](#_Toc217769108)

[Figure S1 – Lung ultrasound 7](#_Toc217769109)

[Figure S2 – Cardiac Ultrasound 8](#_Toc217769110)

[Figure S3 - Pulmonary Function Test Parameters per Combined Parasternal-subcostal US score 9](#_Toc217769111)

[Figure S4 - ROC Curves Analysis for Isolated Apical, Parasternal, and Subcostal Views for Detecting COPD 10](#_Toc217769112)

# Table S1 – Demographic, background medical history, mMRC Dyspnea Scale and POCUS examination stratified by recruiting center

|  | Soroka University Medical Center | | Rabin University Medical Center | |
| --- | --- | --- | --- | --- |
| Characteristic | No COPD | COPD | No COPD | COPD |
| N = 183 (73%) | N = 68 (27%) | N = 38 (76%) | N = 12 (24%) |
| **Demographics** | | | | |
| Age (years), Mean (SD) | 62 (16) | 62 (16) | 56 (19) | 63 (9) |
| Sex (Male), No. (%) | 83 (47%) | 29 (44%) | 15 (41%) | 9 (69%) |
| Ethnicity (Jewish), No. (%) | 163 (90%) | 58 (87%) | 38 (100%) | 10 (77%) |
| BMI (kg/m²), Mean (SD) | 29 (11) | 26 (5) | 26.4 (4.7) | 27.1 (6.5) |
| Smoking History, No. (%) | 74 (54%) | 59 (94%) | 30 (79%) | 12 (92%) |
| Pack Years, Mean (SD) | 13 (21) | 43 (17) | 13 (19) | 40 (18) |
| **Background Medical History** | | | | |
| Hospitalizations due to Lung Disease, No. (%) | 16 (8.7%) | 9 (13%) | 3 (7.9%) | 5 (38%) |
| Use of Bronchodilators, No. (%) | 53 (29%) | 53 (79%) | 6 (16%) | 11 (85%) |
| Home Oxygen Use, No. (%) | 2 (1.1%) | 8 (12%) | 0 (0%) | 0 (0%) |
| Home BPAP Use, No. (%) | 6 (3.3%) | 5 (7.5%) | 0 (0%) | 0 (0%) |
| Myocardial Infarction, No. (%) | 15 (8.2%) | 6 (9.0%) | 4 (11%) | 1 (7.7%) |
| Congestive Heart Failure, No. (%) | 19 (10%) | 6 (9.0%) | 4 (11%) | 1 (7.7%) |
| Peripheral Vascular Disease, No. (%) | 31 (17%) | 11 (16%) | 8 (21%) | 2 (15%) |
| Cerebrovascular Disease, No. (%) | 39 (21%) | 8 (12%) | 5 (13%) | 2 (15%) |
| Dementia, No. (%) | 0 (0%) | 0 (0%) | 0 (0%) | 0 (0%) |
| Rheumatologic Disease, No. (%) | 25 (14%) | 9 (13%) | 4 (11%) | 0 (0%) |
| Peptic Ulcer Disease, No. (%) | 15 (8.2%) | 9 (13%) | 3 (7.9%) | 1 (7.7%) |
| Mild Liver Disease, No. (%) | 33 (18%) | 15 (22%) | 7 (18%) | 4 (31%) |
| Diabetes, No. (%) | 77 (42%) | 29 (43%) | 10 (26%) | 5 (38%) |
| Diabetes with Complications, No. (%) | 5 (2.7%) | 0 (0%) | 1 (2.6%) | 0 (0%) |
| Hemiplegia or Paraplegia, No. (%) | 5 (2.7%) | 0 (0%) | 1 (2.6%) | 1 (7.7%) |
| Renal Disease, No. (%) | 21 (11%) | 5 (7.5%) | 2 (5.3%) | 0 (0%) |
| Any Malignancy, No. (%) | 44 (24%) | 16 (24%) | 3 (7.9%) | 2 (15%) |
| Moderate/Severe Liver Disease, No. (%) | 1 (0.5%) | 1 (1.5%) | 1 (2.6%) | 0 (0%) |
| Metastatic Solid Tumor, No. (%) | 8 (4.4%) | 3 (4.5%) | 0 (0%) | 0 (0%) |
| AIDS, No. (%) | 2 (1.1%) | 0 (0%) | 0 (0%) | 0 (0%) |
| Charlson Comorbidity Index, Mean (SD) | 3 (3) | 3 (3) | 2 (3) | 2 (2) |
| Age-Adjusted CCI, Mean (SD) | 5 (3) | 5 (3) | 4 (3) | 4 (3) |
| Asthma, No. (%) | 43 (23%) | 0 (0%) | 7 (18%) | 0 (0%) |
| Bronchiectasis, No. (%) | 4 (2.2%) | 0 (0%) | 6 (16%) | 0 (0%) |
| Cystic Fibrosis, No. (%) | 1 (0.5%) | 0 (0%) | 0 (0%) | 0 (0%) |
| Empyema, No. (%) | 0 (0%) | 0 (0%) | 1 (2.6%) | 0 (0%) |
| Hypoplastic Lung, No. (%) | 0 (0%) | 0 (0%) | 1 (2.6%) | 0 (0%) |
| Interstitial Lung Disease, No. (%) | 0 (0%) | 0 (0%) | 6 (16%) | 0 (0%) |
| Restrictive Disease, No. (%) | 0 (0%) | 0 (0%) | 2 (5.3%) | 0 (0%) |
| Sarcoidosis, No. (%) | 0 (0%) | 0 (0%) | 1 (2.6%) | 0 (0%) |
| Pulmonary function tests during visit | | | | |
| FVC % predicted, Mean (SD) | 86 (21) | 61 (8) | 88 (18) | 62 (9) |
| Oxygen Saturation (%), Mean (SD) | 97 (2) | 96 (3) | NA (NA) | NA (NA) |
| FEV1 % predicted, Mean (SD) | 84 (23) | 50 (13) | 85 (22) | 54 (24) |
| FEV1/FVC ratio, Mean (SD) | 80 (10) | 57 (10) | 78(10) | 56 (9) |
| FEF25-75 % predicted, Mean (SD) | 72 (34) | 35 (23) | 70 (31) | 35 (18) |
| TLC % predicted, Mean (SD) | 94 (8) | 127 (6) | 93 (6) | 131 (14) |
| RV % predicted, Mean (SD) | 92 (10) | 164 (21) | 92 (6) | 177 (16) |
| RV/TLC %, Mean (SD) | 29 (4) | 52 (10) | 30 (5) | 53 (4) |
| DLCO % predicted, Mean (SD) | 78 (21) | 61 (24) | 77 (19) | 65 (17) |
| KCO % predicted, Mean (SD) | 98 (27) | 78 (25) | 96 (28) | 83 (21) |
| mMRC Dyspnea Scale, No. (%) | | | | |
| 0 | 54 (30%) | 4 (6.0%) | 20 (53%) | 1 (7.7%) |
| 1 | 35 (19%) | 5 (7.5%) | 8 (21%) | 3 (23%) |
| 2 | 31 (17%) | 11 (16%) | 5 (13%) | 3 (23%) |
| 3 | 40 (22%) | 34 (51%) | 5 (13%) | 6 (46%) |
| 4 | 23 (13%) | 13 (19%) | 0 (0%) | 0 (0%) |
| Hands-on POCUS examination | | | | |
| A lines, Mean (SD) | 6.07 (2.03) | 6.43 (2.08) | 2.89 (1.83) | 2.61(2.89) |
| B lines, Mean (SD) | 0.33 (1.28) | 0.71 (2.05) | 1.105 (1.79) | 1.53 (2.20) |
| Parasternal, No. (%) | | | | |
| High-quality view | 96 (52%) | 3 (4.5%) | 22 (58%) | 1 (7.7%) |
| Acceptable view | 64 (35%) | 28 (42%) | 8 (21%) | 6 (46%) |
| Poor-quality view | 23 (13%) | 36 (54%) | 8 (21%) | 6 (46%) |
| Subcostal, No. (%) | | | | |
| Poor-quality view | 34 (19%) | 2 (3.0%) | 4 (11%) | 0 (0%) |
| Acceptable view | 64 (35%) | 20 (30%) | 8 (21%) | 1 (7.7%) |
| High-quality view | 85 (46%) | 45 (67%) | 26 (68%) | 12 (92%) |
| Apical, No. (%) | | | | |
| High-quality view | 89 (49%) | 31 (46%) | 24 (63%) | 7 (54%) |
| Acceptable view | 53 (29%) | 16 (24%) | 8 (21%) | 2 (15%) |
| Poor-quality view | 41 (22%) | 20 (30%) | 6 (16%) | 4 (31%) |

# Table S2 . POCUS as a predictor of PFT metrics

| **Composite Parasternal–Subcostal Ultrasound Score (range 0–4)** | **FVC % Predicted** | | **FEV1 % Predicted** | | **FEV1/FVC Ratio** | | **FEF25-75 % Predicted** | | **TLC % Predicted** | | **RV % Predicted** | | **RV/TLC%** | | **DLCO % Predicted** | | **KCO % Predicted** | |
| --- | --- | --- | --- | --- | --- | --- | --- | --- | --- | --- | --- | --- | --- | --- | --- | --- | --- | --- |
| Beta (95% CI) | p-value | Beta (95% CI) | p-value | Beta (95% CI) | p-value | Beta (95% CI) | p-value | Beta (95% CI) | p-value | Beta (95% CI) | p-value | Beta (95% CI) | p-value | Beta (95% CI) | p-value | Beta (95% CI) | p-value |
| 0 (Reference level) | — | <0.001 | — | <0.001 | — | <0.001 | — | <0.001 | — | <0.001 | — | <0.001 | — | <0.001 | — | 0.6 | — | 0.2 |
| 1 | 0.30 (-11, 12) |  | -1.0 (-14, 12) |  | -4.9 (-12, 2.4) |  | -9.3 (-28, 9.4) |  | 0.66 (-8.4, 9.7) |  | -0.66 (-21, 20) |  | -1 (6,-7_ |  | 3.6 (-11, 19) |  | 2.3 (-16, 20) |  |
| 2 | 3.8 (-6.4, 14) |  | -0.15 (-12, 12) |  | -5.9 (-12, 0.69) |  | -14 (-31, 3.3) |  | 5.8 (-2.3, 14) |  | 8.4 (-9.7, 26) |  | 2 (8,-4) |  | 5.4 (-8.3, 19) |  | -3.0 (-20, 14) |  |
| 3 | -8.1 (-19, 2.6) |  | -13 (-26, -0.41) |  | -13 (-20, -6.5) |  | -27 (-44, -9.0) |  | 21 (13, 29) |  | 42 (24, 61) |  | 13 (19,7) |  | 0.02 (-14, 14) |  | 0.54 (-17, 18) |  |
| 4 | -10 (-22, 0.80) |  | -18 (-32, -5.0) |  | -18 (-25, -11) |  | -32 (-51, -14) |  | 24 (15, 33) |  | 48 (28, 69) |  | 14 (20,7) |  | -1.2 (-16, 14) |  | -13 (-31, 4.9) |  |
| ¹Coefficients represent mean differences from the reference group (composite score of 0). Global p-values test overall group differences. ²CI = Confidence Interval | | | | | | | | | | | | | | | | | | |

The table shows how combined parasternal-subcostal cardiac POCUS scores (on a scale of 0-4) correlate with different lung function metrics (PFT parameters). DLCO: diffusing capacity of the lungs for carbon monoxide, DLCO= Diffusing Capacity of the Lungs for Carbon Monoxide, FEF25-75%= Forced Expiratory Flow at 25-75, FEV1= Forced Expiratory Volume in one Second, FVC= forced vital capacity, KCO= carbon monoxide transfer coefficient, RV= Residual Volume. TLC= Total Lung Capacity.

# Figure S1 – Lung ultrasound


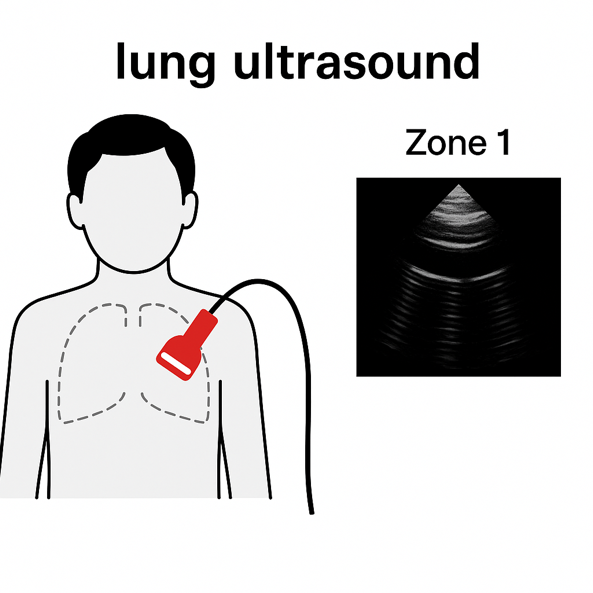


Figure S1. The ultrasound probe is placed at zone 1 on the anterior chest

# Figure S2 – Cardiac Ultrasound

**
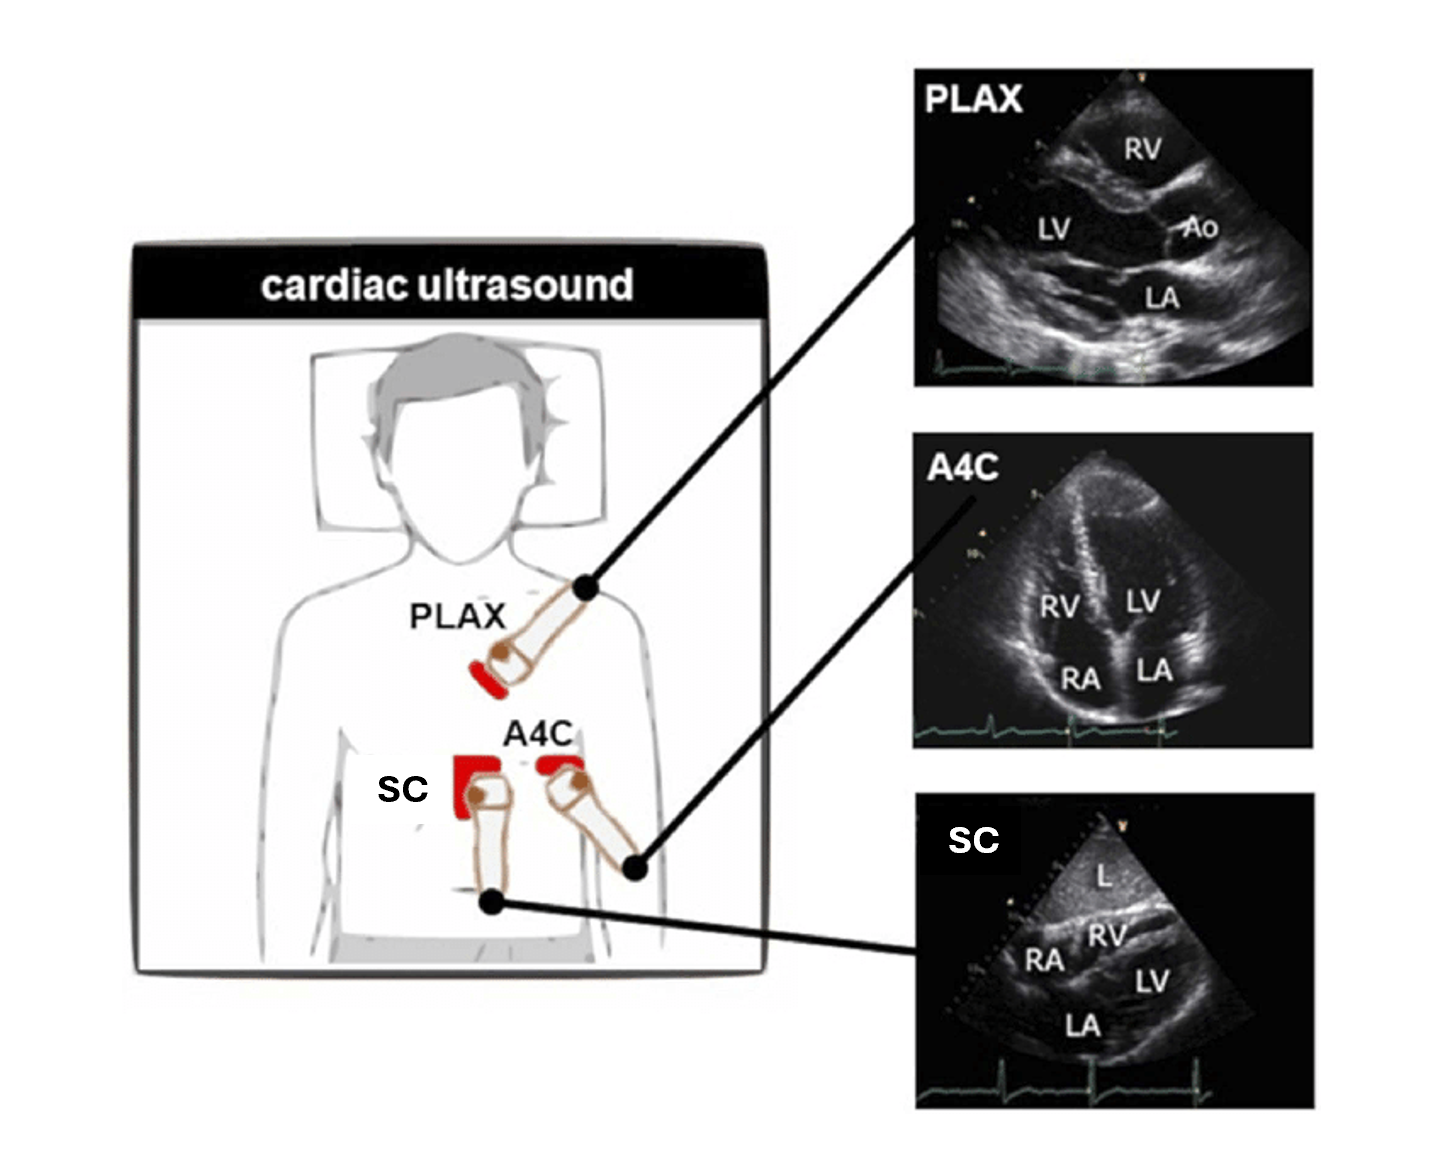
**

Figure S2**.** The formal 3-part cardiac exam (Parasternal, Apical, and the subcostal views)

# Figure S3 - Pulmonary Function Test Parameters per Combined Parasternal-subcostal US score


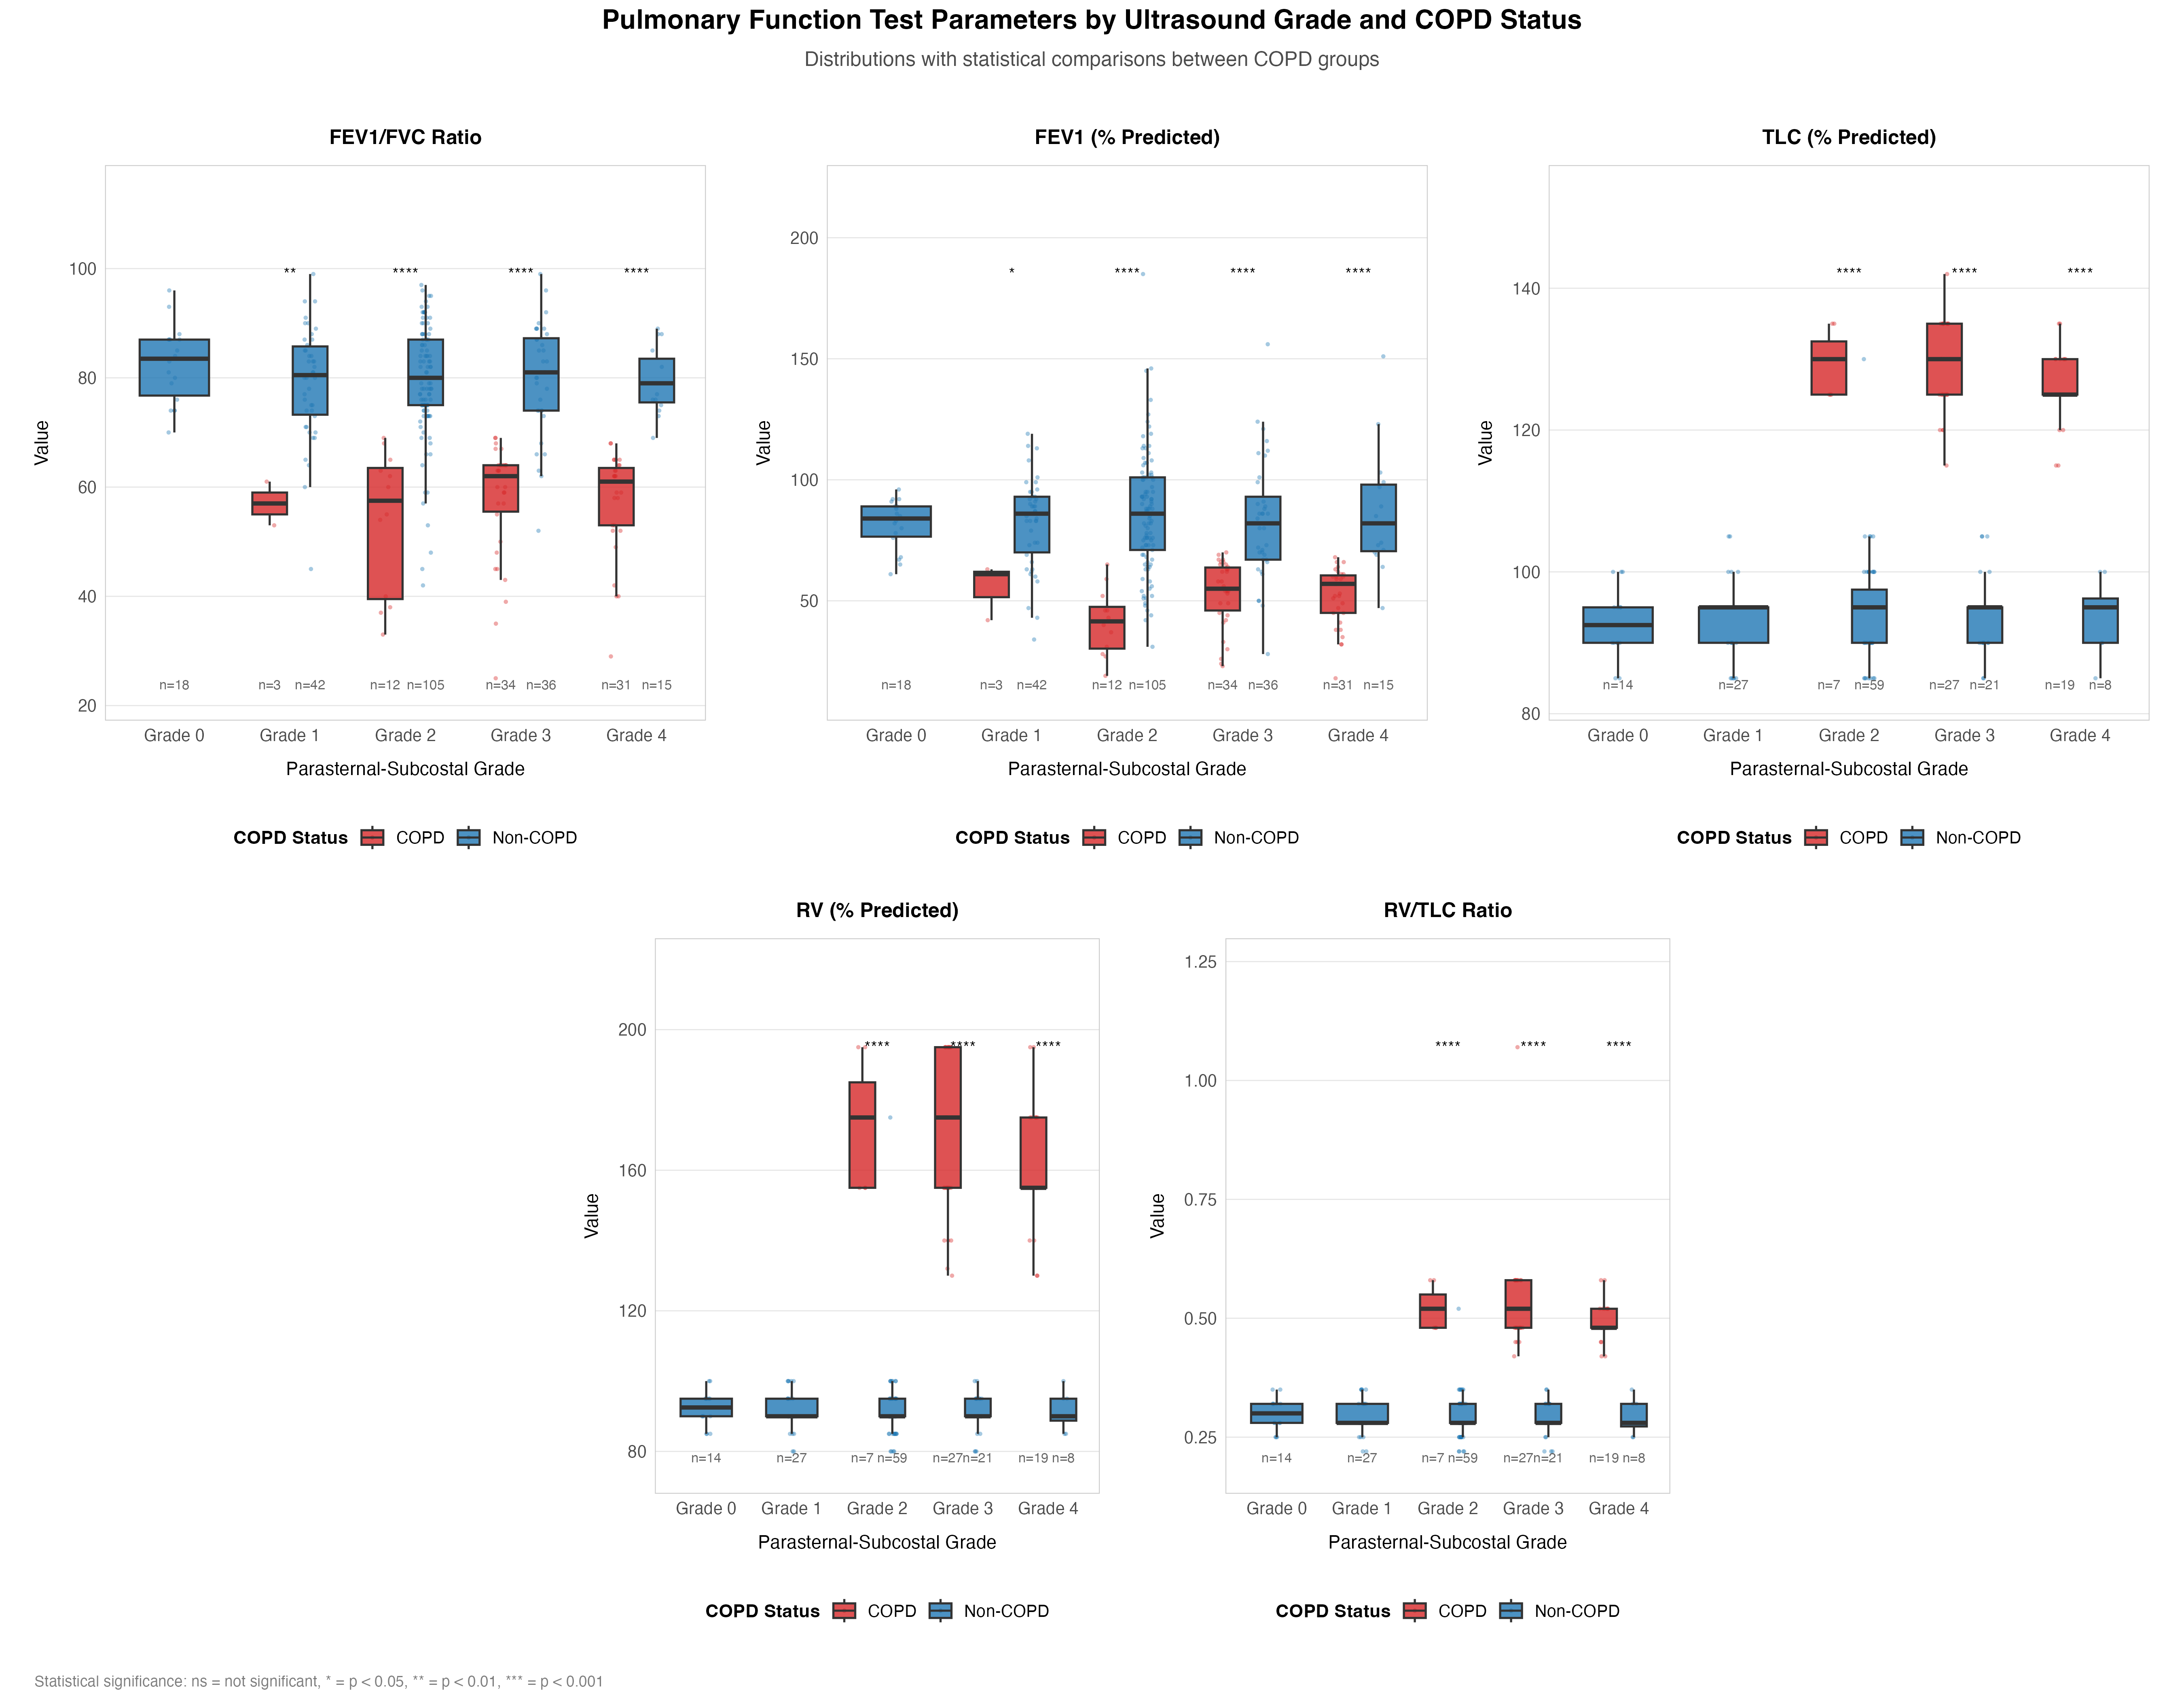


Figure S3. Pulmonary function test parameters by parasternal-subcostal ultrasound grade and COPD status. Red boxes represent patients with COPD, blue boxes represent patients without COPD. Statistical significance: * = *p* < 0.05, ** = *p* < 0.01, *** = *p* < 0.001. FEV1 = forced expiratory volume in 1 second; FVC = forced vital capacity; TLC = total lung capacity; RV = residual volume.

# Figure *S*4 - ROC Curves Analysis for Isolated Apical, Parasternal, and Subcostal Views for Detecting COPD


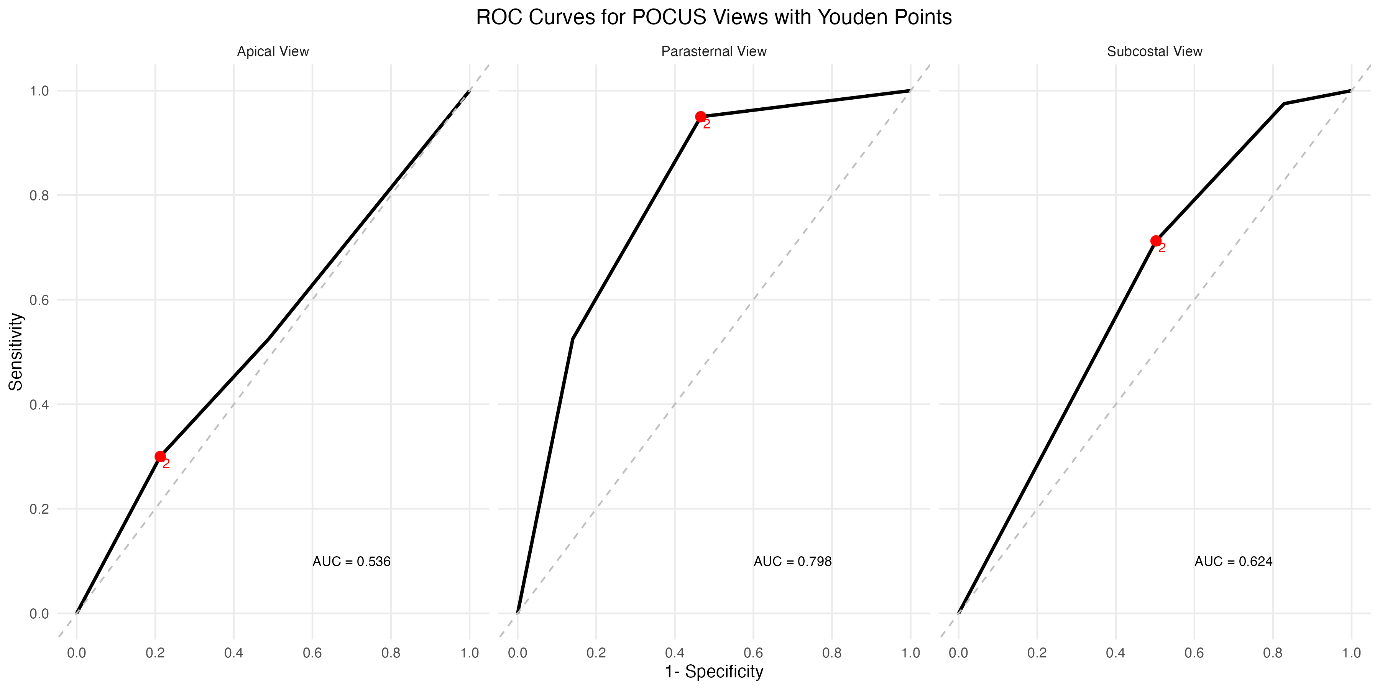


Figure S4. Receiver Operating Characteristic (ROC) curves for three Point-of-Care Ultrasound (POCUS) views in COPD diagnosis. The black solid lines represent ROC curves for the Apical view (0=High-quality view , 1=Acceptable view, 2=Poor-quality view), Parasternal view (0=High-quality view , 1=Acceptable view, 2=Poor-quality view), and Subxiphoid view (0=Poor-quality view, 1=Acceptable view, 2=High-quality view ). Their respective Area Under the Curve (AUC) values are 0.536, 0.798, and 0.624. Red dots indicate optimal cutoff points for each view based on Youden's index. The dashed diagonal line represents the reference line of no discrimination (AUC = 0.5).

ROC Analysis Results:

| **Metric** | **Parasternal View** | **Subcostal View** | **Apical View** |
| --- | --- | --- | --- |
| **AUC** | 0.798 | 0.624 | 0.536 |
| **Optimal cutoff (Youden)** | 1 (Acceptable view) | 2 (Poor-quality view) | 2 (High-quality view |
| **Sensitivity** | 95.00% | 71.25% | 30.00% |
| **Specificity** | 53.39% | 49.77% | 78.73% |
| **PPV** | 57.54% | 66.07% | 66.20% |
| **NPV** | 3.28% | 17.29% | 24.35% |
